# Supplementary material for: Acute Exposure to Zearalenone Disturbs Intestinal Homeostasis by Modulating the Wnt/β-Catenin Signaling Pathway
Source: Toxins (Basel). 2020 Feb 11;12(2):113. doi: 10.3390/toxins12020113 (PMC7076757; doi:10.3390/toxins12020113)
Supplement: Supplementary file 1 [file toxins-12-00113-s001.xlsx]

## Sheet: S1
Table S1: Results of the RT-qPCR of pig intestinal explants exposed for 1 h or 4 h to 100 µM ZEN
Gene symbol	Gene name	1h exposition		4h exposition
		p-value	ratio ZEN/C	p-value	ratio ZEN/C
CDH1	E-Cadherin	0,18	0.66	0.08	1.4
CDH2	N-Cadherin	0.43	0.92	0.39	0.9
CDH3	P-Cadherin	0.71	0.95	0.18	1.2
Adiponectin	Adiponectin	0.24	0.34	0.47	1.7
ADIPOR2	Adiponectin Receptor 2	0.18	1.53	0.05	1.3
CAP1	Cyclase Associated Actin Cytoskeleton Regulatory Protein 1	0.89	1.07	0.03	1.22
CMKLR1	Chemerin Chemokine-Like Receptor 1	0.88	0.91	0.04	1.33
BD3	β-defensin 3	0.51	0.77	0.01	0.51
BD1	β-defensin 1	0.7	1.19	0.06	1.27
LYZ	Lysozyme	0.98	1.01	0.07	1.81
PR39	Protegrin 39	0.2	0.39	0.85	1.17
Reg3γ	Regenerating islet-derived protein 3 gamma	0.33	1.57	0.23	1.16
SMAD7	SMAD Family Member 7	0.32	1.61	0.1	0.68
ANXA2	Annexin A2	0.76	1.22	0.6	1.44
S100A8	S100 Calcium Binding Protein A8	0.12	0.8	0.27	0.8
S100A12	S100 Calcium Binding Protein A12	0.72	0.76	0.34	1.91
S100A10	S100 Calcium Binding Protein A10	0.05	0.76	0.03	0.74
S100A4	S100 Calcium Binding Protein A4	0.23	1.15	0.18	1.2
FN1	Fibronectin 1	0.12	0.881	0.07	0.81
Cyclin D1	Cyclin D1	0.22	1.29	0.01	1.3
LEF1	Lymphoid Enhancer Binding Factor 1	0.94	0.07	0.91	0.9
MCM3	Minichromosome Maintenance Complex Component 3	0.25	1.15	0.01	1.16
TCF1	Transcriptional activator 1	0.04	1.15	0.68	1
TCF3	Transcriptional activator 3	0.8	1.56	0.15	1.18
TCF4	Transcriptional activator 4	0.004	0.83	0.03	0.75
MMP2	Matrix Metalloproteinase 2	0.11	0.86	0.02	0.73
MMP7	Matrix Metalloproteinase 7	0.68	1.09	0.35	0.51
MMP9	Matrix Metalloproteinase 9/	0.39	1.19	0.03	0.67
SNAIL 2	Snail Family Transcriptional Repressor 2	0.13	1.28	0.01	1.2
SNAIL1	Snail Family Transcriptional Repressor 1	0.39	1.18	0.08	1.75
CD44	CD44 Molecule (Indian Blood Group)	0.59	1.15	0.12	0.7
IFNg	Interferon Gamma	0.46	1.3	0.38	1.22
IL17	Interleukin 17	0.13	2.85	0.42	1.21
IL18	Interleukin 18	0.7	1.29	0.93	0.98
IL22	Interleukin 22	0.25	1.83	0.25	1.54
IL8	Interleukin 8	0.56	1.36	0.42	1.55
LCN2	Lipocalin 2	0.89	0.94	0.28	2.41
MUC1	Mucin 1	0.31	0.42	0.06	1.3
TNFα	Tumor Necrosis Factor alpha	0.74	1.16	0.11	1.19
SAA3	Serum Amyloid A3	0.33	0.5	0.11	1.91
PPARα	Peroxisome Proliferator Activated Receptor Alpha	0.56	1.35	0.28	1.27
PPARγ	Peroxisome Proliferator Activated Receptor Gamma	0.06	0.91	0.63	0.9
VIM	Vimentin	0.76	1.33	0.01	1.66
DKK1	Dickkopf WNT Signaling Pathway Inhibitor 1	0.16	0.68	0.04	0.5
APC	Adenomatous Polyposis Coli Protein	0.06	0.69	0.01	0.71
Axin1	Axin 1	0.3	1.09	0.09	1.4
Axin2	Axin 2	0.06	0.96	0.38	0.88
C-myc	Myc Proto-Oncogene Protein	0.16	1.29	0.04	1.38
CTNNA1	Catenin Alpha 1	0.18	1.7	0.03	1.35
CTNNB1	Catenin Beta 1	0.72	1.2	0.02	1.43
GSK3-β	Glycogen Synthase Kinase 3 Beta	0.11	1.43	0.49	1.07
ITGA10	Integrin Subunit Alpha 10	0.04	1.98	0.43	1.4
LRP5	LDL Receptor Related Protein 5	0.47	1.03	0.7	0.96
LRP6	LDL Receptor Related Protein 6	0.1	0.88	0.28	0.83
Wnt 11	Wnt Family Member 11A	0.81	0.94	0.03	0.66
Wnt 4	Wnt Family Member 4	0.4	1.24	0.07	0.8
Wnt1	Wnt Family Member 1	0.35	1.63	0.24	1.4
Wnt2b	Wnt Family Member 2b	0.64	1.03	0.23	1.17
ZEB1	Zinc Finger E-Box Binding Homeobox 1	0.16	2.19	0.03	1.48
ZEB2	Zinc Finger E-Box Binding Homeobox 2	0.18	0.76	0.19	0.86
SMAD1	SMAD Family Member 1	0.79	0.98	0.16	1.19
SMAD2	SMAD Family Member 2	0.0185	0.83	0.0002	0.65
SMAD4	SMAD Family Member 4	0.32	1.03	0.09	1.12
TGF-β1	Transforming Growth Factor Beta 1/	0.03	1.33	0.48	1.04
SMAD3	SMAD Family Member 3	0.3	0.8	0.49	1.12
ATP6AP2	ATPase H+ Transporting Accessory Protein 2	0.92	0.95	0.02	1.48
OCLN	Occludin	0.29	0.42	0.04	1.2
ZO1	Zonula Occludens 1	0.29	1.13	0.04	1.1

## Sheet: S2
Table S2: List of primers used in this study,
Official Gene Name	Transcript ID ENSEMBL	Sequence 5'-3'		pb	% GC	Amplicon	Tm
CDH1	ENSSSCT00000029834.2	F	CATACACGGCCCTCATTATAG	21	47	136	60
		R	CTCTGGCAGAAGTCCATATTT	21	42		60
CDH2	ENSSSCT00000004122.3	F	GACTGGATTCCCTGAAGATG	20	50	129	60
		R	GGTTCGCTGCTTTCATATTG	20	45		60
CDH3	ENSSSCT00000026686.2	F	GGTATCCTGACAACCAAGAAG	21	47	101	60
		R	GGGAGCTTCACCACAAAG	18	55		60
ADIPOQ	ENSSSCT00000047495.1	F	AGGGTGAGAAAGGAGATACA	20	45	141	60
		R	GGTAGACATAGGCGCTTTC	19	52		60
CAP1	ENSSSCT00000004068.3	F	GCGGAAATGGTCCATACA	18	50	104	60
		R	GGTGCCAACAATTCAGAAAG	20	45		60
CMKLR1	ENSSSCT00000058690.1	F	TGAGGACCCTTCCATCAG	18	56.6	99	60
		R	TCACTGTTGTGACATCCAAA	20	40		60
BD1	ENSSSCT00005005133.1	F	TTCCTCCTCATGGTCCTGTT	20	50	130	56
		R	AGGTGCCGATCTGTTTCATC	20	50		55
LYZ	ENSSSCT00000034939.1	F	GGTCTATGATCGGTGCGAGTTC	22	54.5	51	66.8
		R	TCCATGCCAGACTTTTTCAGAAT	23	39.1		65.6
Reg3g	ENSSSCT00000034539.2	F	CTCCTGTCTCAGGTCCAA	18	55.6	116	60
		R	GGTGTTATAAACAAGGCATAGC	22	40.9		60
ANXA2	ENSSSCT00000005057.4	F	GCTGAAAGCCTCCATGA	17	52.9	111	59
		R	CTCCTTGTAGACTCTGTTAATTTC	24	37		59
S100A8	ENSSSCT00000036517.2	F	GAGACGGAGTGTCCTAAGTA	20	50	121	60
		R	CCACCTTGATCACCAGTATG	20	50		60
S100A12	ENSSSCT00000038862.1	F	AAGGAACTGCCCAACAC	17	52.9	118	60
		R	CCAGGACCACGAATTCTTTA	20	45		60
S100A10	ENSSSCT00000007246.4	F	CAAAGGAGGACCTGAGAGTA	20	50	126	60
		R	AGCCCACTTTCCCATCT	17	52.9		60
S100A4	ENSSSCT00000033355.2	F	CAAGGAGGGTGACAAGTTC	19	52.6	107	60
		R	TCTGGAAAGCAGCTTCATC	19	47.4		60
Fibronectine 1	ENSSSCT00000017610.3	F	AATGCACCAGAACCATCTC	19	47	101	60
		R	TTCAAGTGGCCTGGAATG	18	50		60
CCND1	ENSSSCT00000046016.1	F	GAAGTTCCAACAGCTTCCT	19	47.7	106	60
		R	GCTTCGATCTGCTCCTG	17	58.5		59
LEF1	ENSSSCT00000010018.2	F	GATCACACCCATCACACATC	20	50	122	61
		R	GGTAATCTGTCCAACACCAC	20	50		60
MCM3	ENSSSCT00000031013.2	F	GACCATAGAGCGACGTTATAC	21	47	110	60
		R	GGCCATATTCTGTCTCAAGG	20	50		60
TCF7/1	ENSSSCT00000023234.2	F	TCTACTCCGCCTTCAATCT	19	47.4	99	60
		R	AAGGCTGACTGGCTTTG	17	52.9		60
TCF3	ENSSSCT00000014681.3	F	TGGCCTCATGCACAAC	16	56	98	60
		R	TGATCTCACCAGCTCCA	17	52		60
MMP2	ENSSSCT00000003130.3	F	CGACAAGGATGGCAAGTA	18	50	121	59
		R	GCAGCTGTTGTAGGATGT	18	50		60
MMP9	ENSSSCT00000008139.3	F	AACACACACGACATCTTCC	19	47.7	115	60
		R	TCACGTAGCCCACATAGT	18	50		60
MPP7	ENSSSCT00000016344.3	F	TGCTCACTTTGATGAGGATG	20	45	98	60
		R	GACCTAAAGAATGGCCAAGT	20	45		60
SNAI2	ENSSSCT00000048563.1	F	CGCTCCTTCCTGGTCAA	17	59	84	61
		R	GGAAACGATCACTGTGTGTG	20	50		61
SNAI1	ENSSSCT00000040909.1	F	ACGACTCTTCTCCAGAGTT	19	47.4	96	60
		R	AGGCGGTGGGATTGA	15	60		60
CD44	ENSSSCT00000014523.3	F	CGCCATGGACACCTTT	16	56	133	59
		R	GCTGTAGCGACCATTCTT	18	50		60
IL18	NM_213997	F	CGTGTTTGAGGATATGCCTGATT	23	43	107	66
		R	TGGTTACTGCCAGACCTCTAGTGA	24	50		72
IL22	ENSSSCT00000000520.3	F	CCCAACTCTGATAGATTCCAC	21	47.6	103	60
		R	GCTGGTCATCACCCTTAAT	19	47.4		60
TNF-alpha	NM_214022	F	ACTGCACTTCGAGGTTATCGG	21	52	118	64
		R	GGCGACGGGCTTATCTGA	18	61		58
IFN-gamma	NM_213948	F	TGGTAGCTCTGGGAAACTGAATG	23	47.8261	79	68
		R	GGCTTTGCGCTGGATCTG	18	61.1111		58
IL6	NM_214399	F	TTCACCTCTCCGGACAAAACTG	22	50	122	66
		R	TCTGCCAGTACCTCCTTGCTGT	22	55		68
IL8	NM_213867	F	GCTCTCTGTGAGGCTGCAGTTC	22	59.0909	79	70
		R	AAGGTGTGGAATGCGTATTTATGC	24	41.6667		68
IL17A	NM_001005729.1	F	CCAGACGGCCCTCAGATTAC	20	60	66	58.2
		R	GGTCCTCGTTGCGTTGGA	18	61.1		59.2
LCN2	ENSSSCT00000006200.3	F	AGCAAGGCCGGTTTAAG	17	52.9	109	60
		R	CTGATCCAGTTGTCACAGAG	20	50		60
MUC1	ENSSSCT00000007146.4	F	GCATTACAAACCTCCAGTTTACCT	24	36	123	58
		R	CCCAGAAGCCCGTCTTCTTT	20	55		59
PPAR-alpha	ENSSSCT00000000007.3	F	GTGGCACTGAACATCGAAT	19	47.4	108	61
		R	CCGAATGGTTCTCCGAAAG	19	52.6		60
PPAR-gamma	ENSSSCT00000012672.3	F	GTCAGTACTGTCGGTTTCAG	20	50	99	60
		R	CCAACAGCTTCTCCTTCTC	19	52.6		60
VIM	ENSSSCT00000065218.1	F	AAGCCGAGAGCACTTTG	17	52.9	60	60
		R	CGTGCCAAAGAAGCATTG	18	50		60
DKK1	ENSSSCT00000011413.3	F	TGACAACTATCAGCCATACC	20	45	112	59
		R	GCAGGCTAGGCAGATTT	17	53		59
APC	ENSSSCT00000046118.1	F	ACTTCTTGCTGACCTTGAC	19	47	131	60
		R	GTCTGGTCATATCTGTCTGTAAG	23	43		60
Axin1	ENSSSCT00000023524.2	F	TGACAGCCTATCCCTCAC	18	55.6	90	60
		R	AGGCTCTCCTGCATCTC	17	58.8		60
Axin2	ENSSSCT00000055385.1	F	CAATGGCCAAGTGTCTCTAC	20	50	133	61
		R	GGTCTCCAATTCCAGCTTC	19	52.5		60
C-MYC	ENSSSCT00000006548.4	F	CTGGATTTCCTTCGGATAGTG	21	47	94	60
		R	AGTCGTAGTCGAGGTCATAG	20	50		60
CTNNA1	ENSSSCT00000015666.3	F	GGAGAGTCAGTTTCTCAAGG	20	50	81	60
		R	GCAGCACTCTTCATCAAATC	20	45		59
CTNNB1	ENSSSCT00000012342.3	F	GCTCTCTGTCTGCTCTAGTA	20	50	97	60
		R	AAGACGTTGACTTGGATCTG	20	45		60
GSK3-beta	ENSSSCT00000013006.3	F	GGATAGTGGTGTGGATCAAT	20	45	92	59
		R	CTGTGTAGTTTGGGTTCATTTC	22	40		60
ITGA10	ENSSSCT00000007326.3	F	TCATCCCTCACCTGTTCT	18	50	74	60
		R	GTGATGCACGTCCAGATTA	19	47		60
ITGB1	ENSSSCT00000012148.3	F	GTTGGTAAACAGCGCATATC	20	45	104	59
		R	ACATTCCTCCAGCCAATC	18	50		59
LRP5	ENSSSCT00000026471.2	F	GCTCATCCAGCACCAAG	17	58.8	112	60
		R	GGAATGTTGGAGGAGTAGAAC	21	47.6		60
LRP6	ENSSSCT00000039050.1	F	GCAGTGACAAATCGGATGA	19	47	98	60
		R	GGTGACAATTACGCCAATAAC	21	42		60
Wnt4	ENSSSCT00000003912.3	F	GGAACTGCTCCACCCT	16	62.5	89	61
		R	AGAGATGGCGTACACGAA	18	50		61
Wnt11	ENSSSCT00000024218.2	F	GTGTGCTATGGCATCAAGT	19	47.4	139	60
		R	GCATGAGCTCCAGGTTG	17	58.8		60
Wnt2B	ENSSSCT00000007426.3	F	GGCCCGTTCTTGACAAA	17	52	125	60
		R	CGAATCACAGCCACAGAT	18	50		60
ZEB2	ENSSSCT00000065884.1	F	ACACACAGTGATCGTTTCC	19	47	109	60
		R	GGTCCACACCGCAATG	16	62.5		60
ZEB1	ENSSSCT00000012067.3	F	GAAGGAAGGACAAGAAATCCT	21	43	81	60
		R	GAGTCGCATTCGTCATCTT	19	47		60
SMAD2	ENSSSCT00000004977.3	F	GGTTCTGCCTAGGTTTACTC	20	50	108	60
		R	AAACTTCACCGCCTATGTAA	20	40		60
SMAD4	ENSSSCT00000004997.2	F	CCCACCTAATTTGCCTCAC	19	52	118	61
		R	AGAAATTGGAGGCTGGAATG	20	45		61
SMAD1	ENSSSCT00000009900.3	F	CAGCCCATGGACACAAA	17	52	95	60
		R	CAGTGTTTGGGTTCCTCATA	20	45		60
SMAD7	ENSSSCT00000004979.4	F	CCTCCTCCTTACTCCAGATAC	21	52.4	105	60
		R	GGCCAGATAATTCGTTCCC	19	52.6		60
TGF-beta	ENSSSCT00000036469.2	F	GGATACCAACTACTGCTTCAG	21	47	102	60
		R	GGTTCATGAATCCACTTCCA	20	45		60
SMAD3	ENSSSCT00000005464.2	F	TCACCCAACTGTAACCAGCG	20	55	62	66
		R	CCTGGTGGGATCTTGCAGA	19	57.8		66.4
ATP6AP2	ENSSSCT00000013393.3	F	GAACTGCAGGTGCTACAT	18	50	125	60
		R	CCGTAACGTTTCCCAATTTC	20	45		60
OCLN	U79554	F	AGCTGGAGGAAGACTGGATCAG	22	54.5455	91 pb	68
		R	TGCAGGCCACTGTCAAAATT	20	45		58
ZO1	AJ318101	F	ATAACATCAGCACAGTGCCTAAAGC	25	44	116 pb	72
		R	GTTGCTGTTAAACACGCCTCG	21	52.381		64
ADIPOR2	ENSSSCT00000026686.2	F	TGTTCGCCACCCCTCAGTAT	20	55	71	58
		R	AATGATTCCACTCAGGCCCA	20	50		57
TCF4	ENSSSCT00035106376.1	F	ATCAGCAAGCACTGCCGACT	20	55	167	60
		R	CCAACATTCCTCCGTAGCCA	20	55		57
BD3	ENSSSCT00005005099.1	F	CCTTCTCTTTGCCTTGCTCTT	20	47	163	55
		R	GCCACTCACAGAACAGCTACC	21	57		58
PR39	NM_214450.1	F	AGCAGTCCTCGGAAGCTAATC	21	52	215	57
		R	GTCATTGGATGGGTTCAAGGT	21	48		55
TBP	ENSSSCT00000029370.1	F	GCCCGAAATGCTGAATATAA	20	40	82	60
		R	ATATCAGTGCGGTGGTC	17	52.9		60
HPRT1	ENSSSCT00000051852.1	F	CTGACCTGCTGGATTACA	18	50	73	60
		R	CCCGTTGACTGGTCATTA	18	50		61

## Sheet: S3
Table S3: List of primary antibodies used in this study
Protein name	MW	Purchased from	Antibody reference
RegIIIγ	16 kDa	In-house produced antibody
Serum Amyloid A	15k Da	In-house produced antibody
IL-17A	32 kDa	KingFicher Biotech, St Paul, MN, USA	KP0498S
IL8	11.6 kDa	R&D Systems, Inc. Minneapolis, MN, USA	MAB5351
E-cadherin	97.7 kDa	Cell Signaling Technology, Inc, Danvers, MA, USA	3195
Zonula occludens 1	120kDa	Invitrogen, Carlsbad, CA, USA	61-7300
Acid-1-alpha glycoprotein	47 kDa	In-house produced antibody
Occludin	64 kDa	Invitrogen, Carlsbad, CA, USA	71-1500
β-catenin	85.5 kDa	Abcam Ltd., Cambridge, UK	ab22656
Vimentin	53 kDa	Abcam Ltd., Cambridge, UK	ab8069
Cofilin 1	20 kDa	Abcam Ltd., Cambridge, UK	ab42824
Chemerin Chemokine-Like Receptor 1	45 kDa	AB Clonal, Woburn, MA, USA	A15237
Estrogen Receptor alpha	68 kDa	Abcam Ltd., Cambridge, UK	ab3575
Estrogen Receptor beta	56 kDa	Santa Cruz Biotechnology, Dallas, TX, USA	sc-390243
